# Supplementary material
Source: Springer Nature journal article supplement (https://www.springermedizin.de/resource/supplementary/13058_2011_2893_MOESM2_ESM.pdf/9702722)

**BRCA1**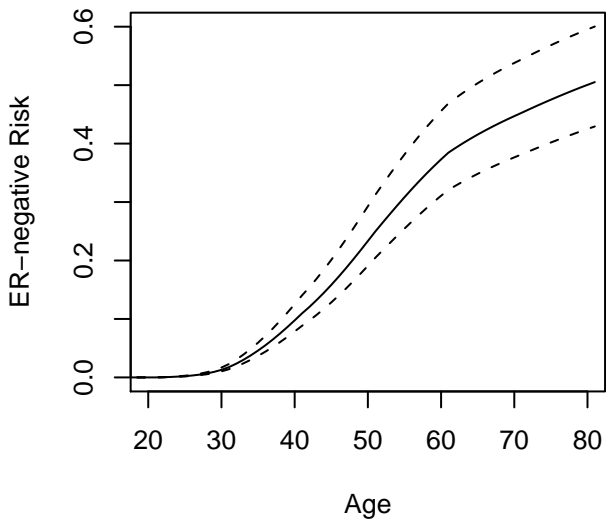**BRCA1**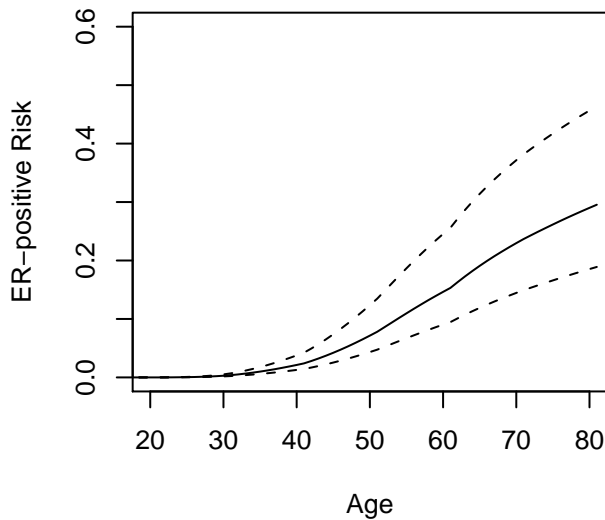**BRCA2**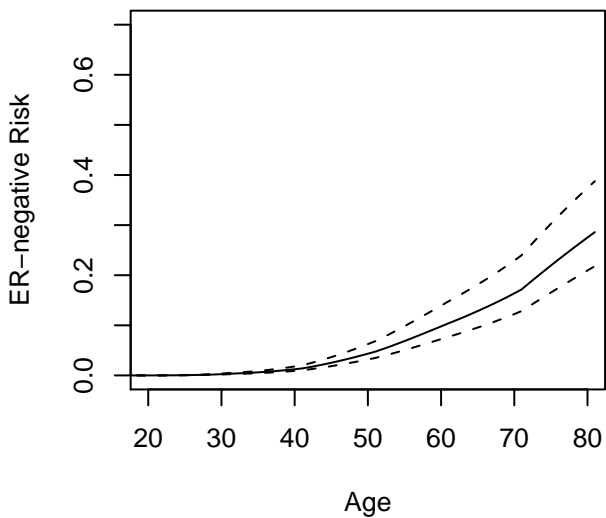**BRCA2**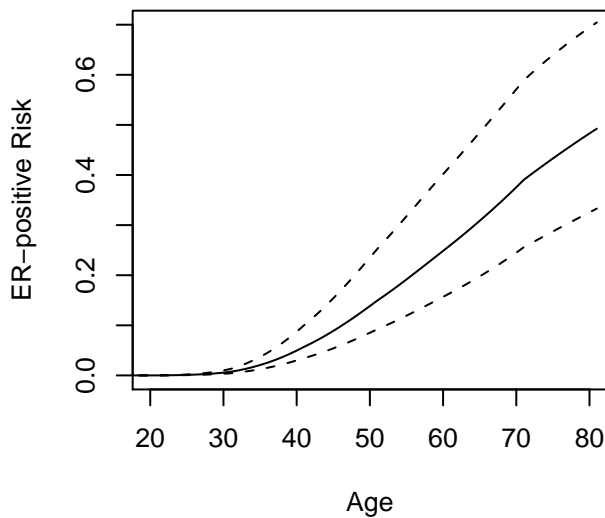

Supplement: MOESM2 [file 9702722]
